# Supplementary material
Source: Springer Nature journal article supplement (https://www.springermedizin.de/resource/supplementary/12885_2014_4712_MOESM11_ESM.pdf/9467102)
Supplement: MOESM11 [file 9467102]

**A****B****C****D**
